# Supplementary material for: Bispecific binder redirected lentiviral vector enables in vivo engineering of CAR-T cells
Source: PubMed Central journal article supplement — J Immunother Cancer. 2021 Sep 12;9(9):e002737. doi: 10.1136/jitc-2021-002737 (PMC8438880; doi:10.1136/jitc-2021-002737), 2021-09-12
Supplement: jitc-2021-002737supp002.pdf [file jitc-2021-002737supp002.pdf]

# Bispecific binder redirected lentiviral vector enables *in vivo* engineering of CAR-T cells

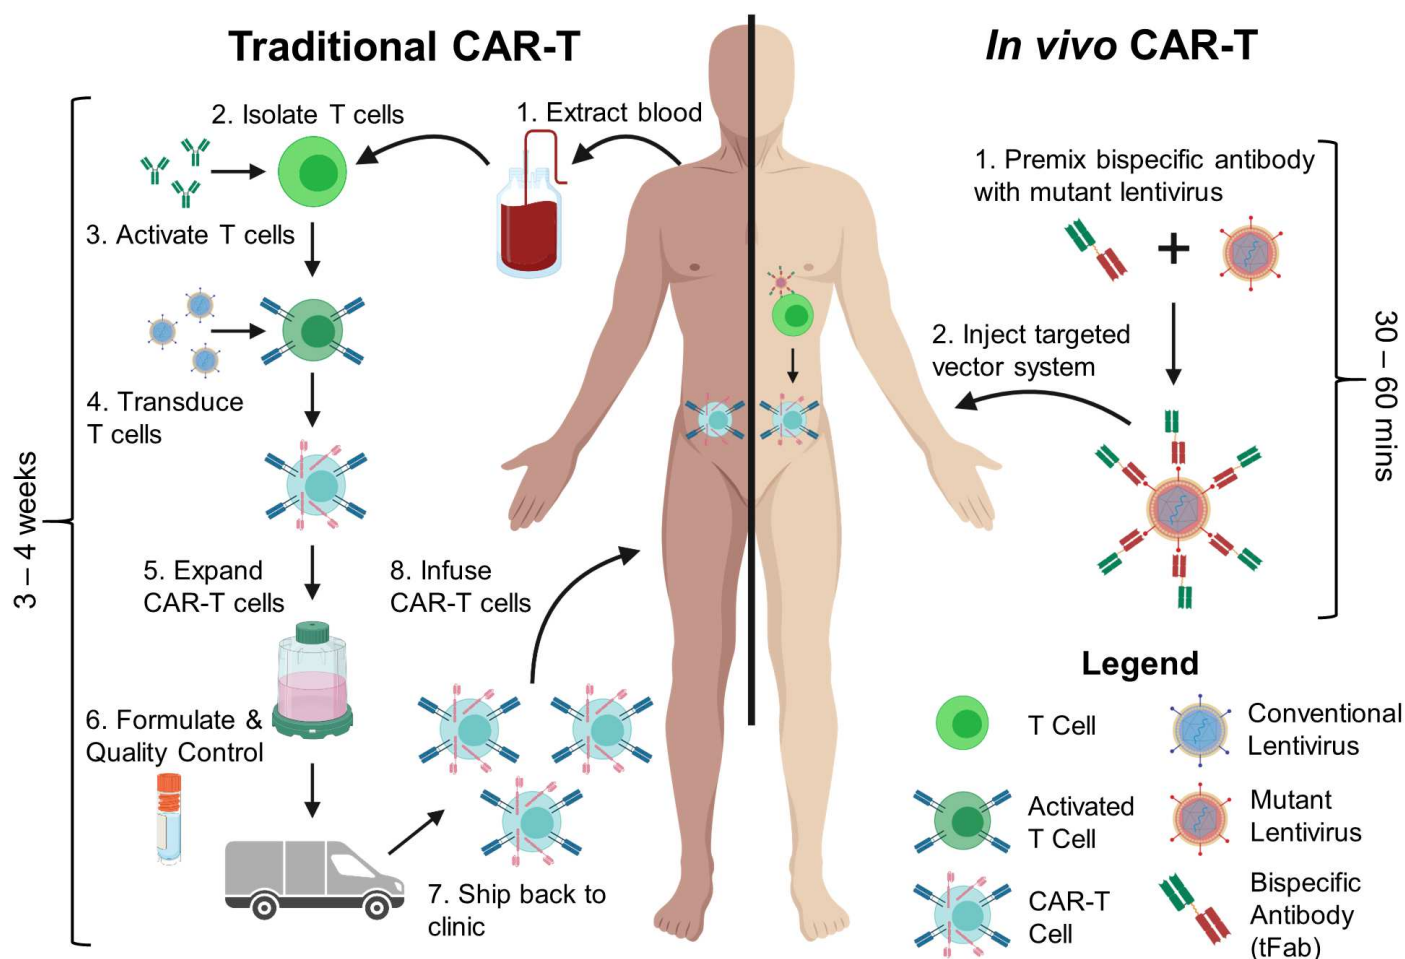

## Authors

Justin T. Huckaby, Elisa Landoni, Timothy M. Jacobs, Barbara Savoldo, Gianpietro Dotti, Samuel K. Lai

## Correspondence

lai@unc.edu

## In Brief

A highly specific and efficient lentiviral gene delivery system, comprising a mutant envelope glycoprotein and bispecific antibody binder for redirection, generates CD19-specific CAR-T cells directly *in vivo* from a single injection and suppresses tumor growth to significantly extend the survival time of mice in an aggressive xenograft B cell tumor model.
